# Supplementary material
Source: PubMed Central journal article supplement (PMC4122230)
Supplement: NIHMS615312-supplement-Appendix_A.pdf [file NIHMS615312-supplement-Appendix_A.pdf]

**Appendix A.** Baseline characteristics for patients with LVEF <30% in the NCDR ICD registry and GWTG-HF database

| Baseline characteristic          | All LVEF <30% patients qualifying for analysis |                      |                            |         | 1:1 matched LVEF <30% patients |                      |                            |         |
|----------------------------------|------------------------------------------------|----------------------|----------------------------|---------|--------------------------------|----------------------|----------------------------|---------|
|                                  | NCDR ICD                                       |                      | %                          |         | NCDR ICD                       |                      | %                          |         |
|                                  | GWTG-HF<br>(N=3428)                            | Registry<br>(N=1150) | Standardized<br>Difference | P Value | GWTG-HF<br>(N=1088)            | Registry<br>(N=1088) | Standardized<br>Difference | P Value |
| Age, yrs                         | 78 (72, 84)                                    | 74 (69, 79)          | 51                         | <.0001  | 75 (70, 80)                    | 75 (70, 80)          | 1                          | 0.81    |
| Male, % (no.)                    | 59% (2029)                                     | 68% (785)            | 19                         | <.0001  | 67% (724)                      | 67% (730)            | 1                          | 0.78    |
| White race, % (no.)              | 77% (2581)                                     | 73% (843)            | 7                          | 0.029   | 71% (764)                      | 74% (803)            | 6                          | 0.20    |
| LVEF (%)                         | 20 (20, 25)                                    | 20 (15, 25)          | 21                         | <.0001  | 20 (18, 25)                    | 20 (16, 25)          | 3                          | 0.59    |
| Ischemic heart disease, % (no.)  | 67% (2299)                                     | 71% (812)            | 8                          | 0.025   | 72% (783)                      | 71% (772)            | 2                          | 0.60    |
| Prior atrial arrhythmia, % (no.) | 31% (1074)                                     | 42% (482)            | 22                         | <.0001  | 37% (406)                      | 40% (433)            | 5                          | 0.23    |
| Systolic BP, mm Hg               | 131 (115, 150)                                 | 124 (110, 140)       | 28                         | <.0001  | 124 (110, 141)                 | 125 (110, 141)       | 2                          | 0.62    |
| Diabetes, % (no.)                | 38% (1308)                                     | 43% (497)            | 10                         | 0.0023  | 44% (478)                      | 44% (473)            | 1                          | 0.84    |
| Hypertension, % (no.)            | 68% (2339)                                     | 82% (948)            | 33                         | <.0001  | 81% (878)                      | 82% (888)            | 2                          | 0.58    |
| ACE-I or ARB, % (no.)            | 72% (2482)                                     | 73% (833)            | 1                          | 0.71    | 72% (783)                      | 74% (794)            | 3                          | 0.42    |
| Beta-blocker, % (no.)            | 84% (2894)                                     | 85% (968)            | 1                          | 0.75    | 86% (935)                      | 85% (921)            | 2                          | 0.66    |
| Digoxin, % (no.)                 | 37% (1111)                                     | 36% (413)            | 3                          | 0.44    | 39% (371)                      | 36% (388)            | 6                          | 0.17    |
| Diuretic, % (no.)                | 84% (2581)                                     | 79% (905)            | 12                         | 0.0003  | 78% (776)                      | 80% (868)            | 5                          | 0.21    |
| Statin, % (no.)                  | 34% (1135)                                     | 60% (682)            | 53                         | <.0001  | 59% (631)                      | 58% (623)            | 2                          | 0.62    |

Data presented as median (25th, 75th), unless otherwise indicated. ACE-I indicates angiotensin-converting enzyme inhibitor; ARB, angiotensin receptor blocker; BP, blood pressure; GWTG-HF, Get With The Guidelines-Heart Failure; LVEF, left ventricular ejection fraction; NCDR, National Cardiovascular Data Registry.
